# Supplementary material for: Nrf2 is highly expressed in neutrophils, but myeloid cell-derived Nrf2 is dispensable for wound healing in mice
Source: PubMed Central journal article supplement (PMC5658185; doi:10.1371/journal.pone.0187162), 2017-10-26

S1 Fig. Gating strategy for sorting cells from 5-day wounds.

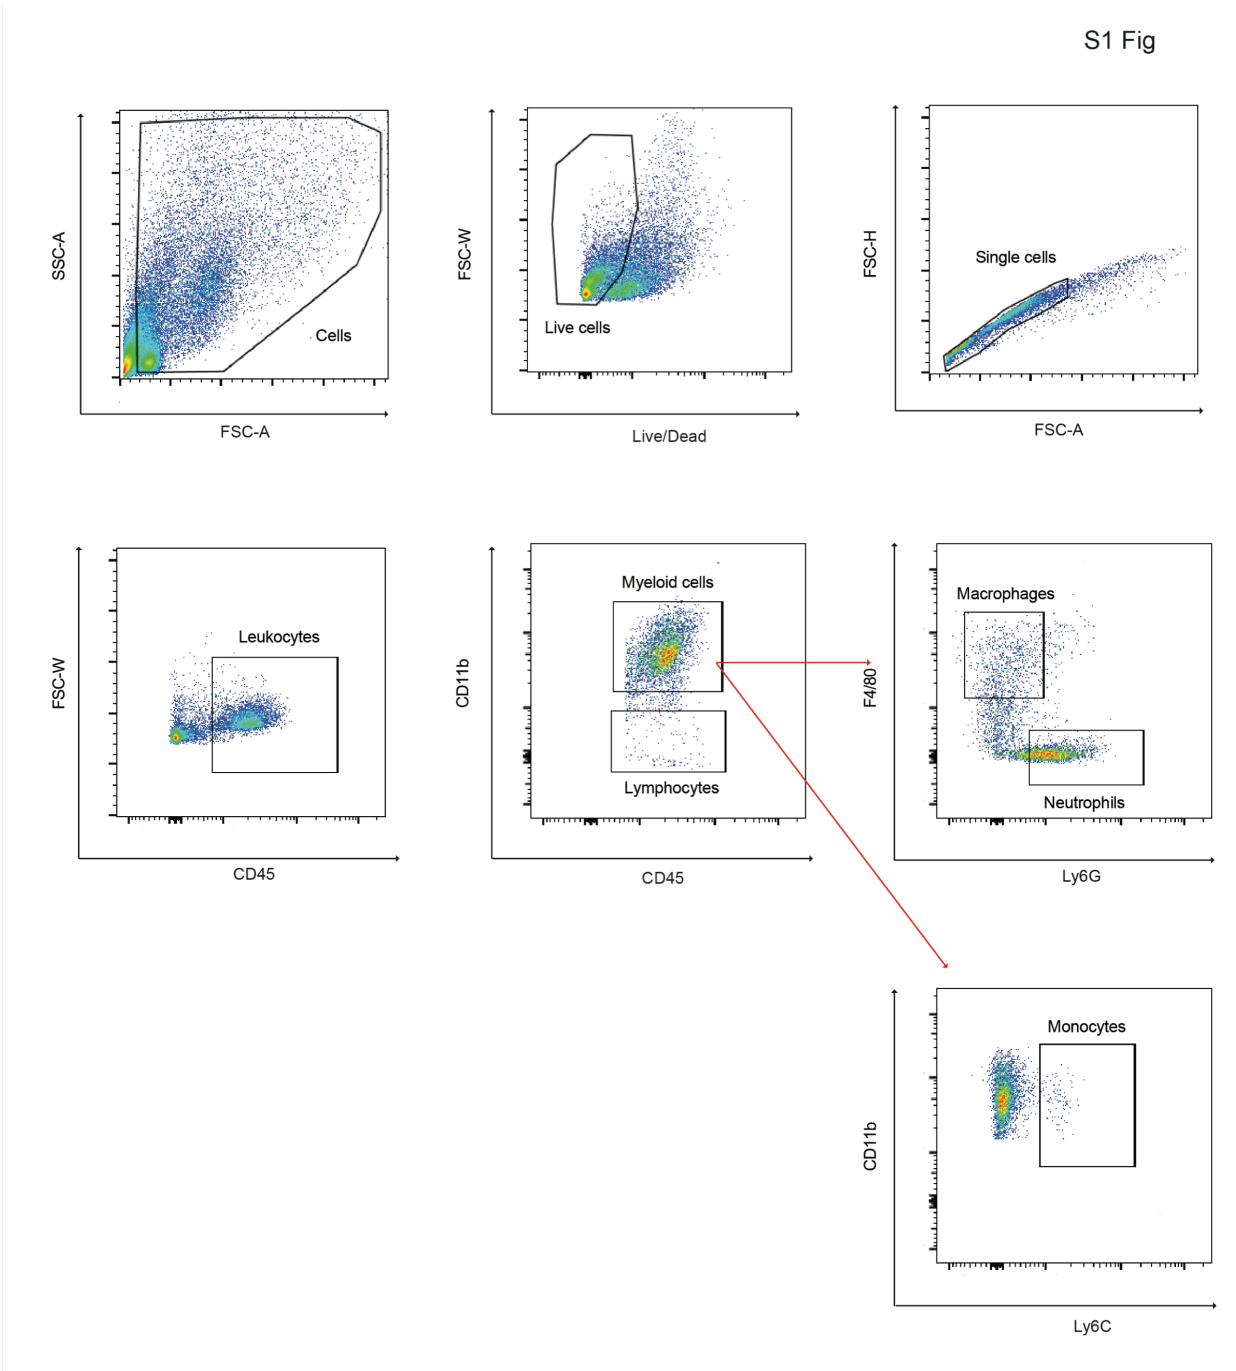

Supplement: pone.0187162.s001.pdf [file pone.0187162.s001.pdf]
