# Supplementary material for: Nrf2 is highly expressed in neutrophils, but myeloid cell-derived Nrf2 is dispensable for wound healing in mice
Source: PubMed Central journal article supplement (PMC5658185; doi:10.1371/journal.pone.0187162), 2017-10-26

**S2 Fig. Gating strategy for characterizing LysM-Cre/Rosa-RFP mice.**

S2 Fig

**A** Blood: Steady state

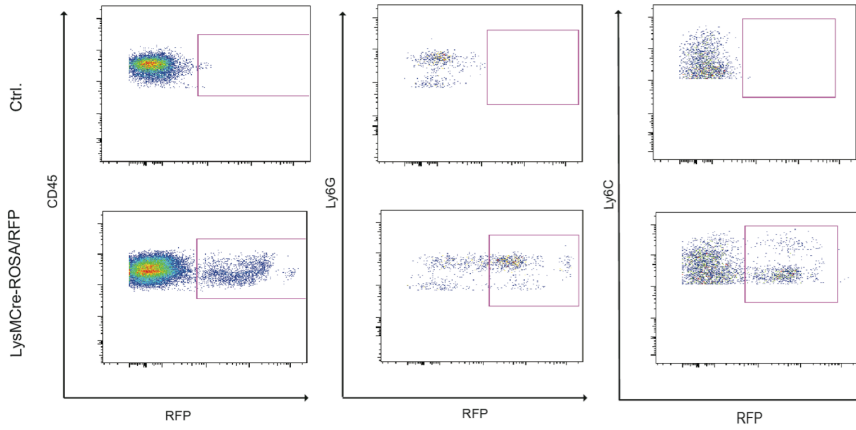

**B** 5dw

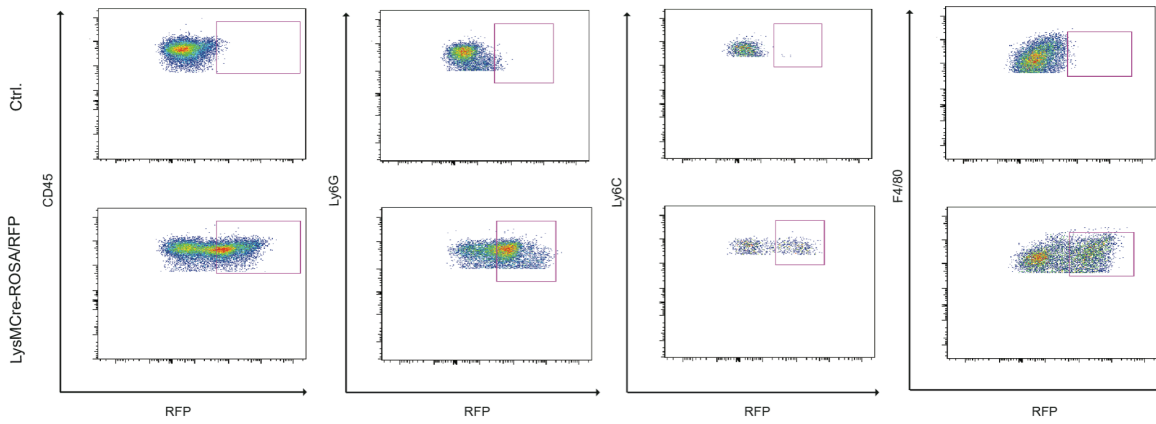

Supplement: pone.0187162.s002.pdf [file pone.0187162.s002.pdf]
