# Supplementary material for: Nrf2 is highly expressed in neutrophils, but myeloid cell-derived Nrf2 is dispensable for wound healing in mice
Source: PubMed Central journal article supplement (PMC5658185; doi:10.1371/journal.pone.0187162), 2017-10-26

**S4 Fig. Genetic activation of Nrf2 in myeloid cells of C57BL/6 mice.**

**A**

Sorted cells: 5 day wounds

S4 Fig

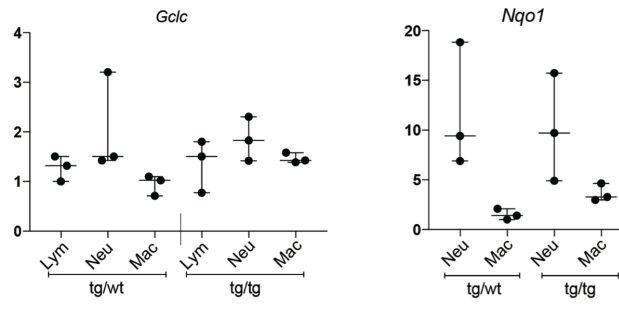

Supplement: pone.0187162.s004.pdf [file pone.0187162.s004.pdf]
