# Supplementary material for: Nrf2 is highly expressed in neutrophils, but myeloid cell-derived Nrf2 is dispensable for wound healing in mice
Source: PubMed Central journal article supplement (PMC5658185; doi:10.1371/journal.pone.0187162), 2017-10-26

S5 Fig. Characterization of non-wounded skin from LysM-Cre Nrf2-ko mice.

A LysMCre-Nrf2fl/fl

S5 Fig

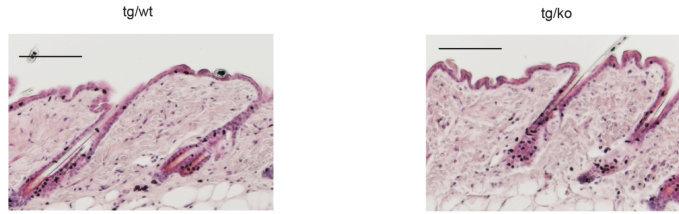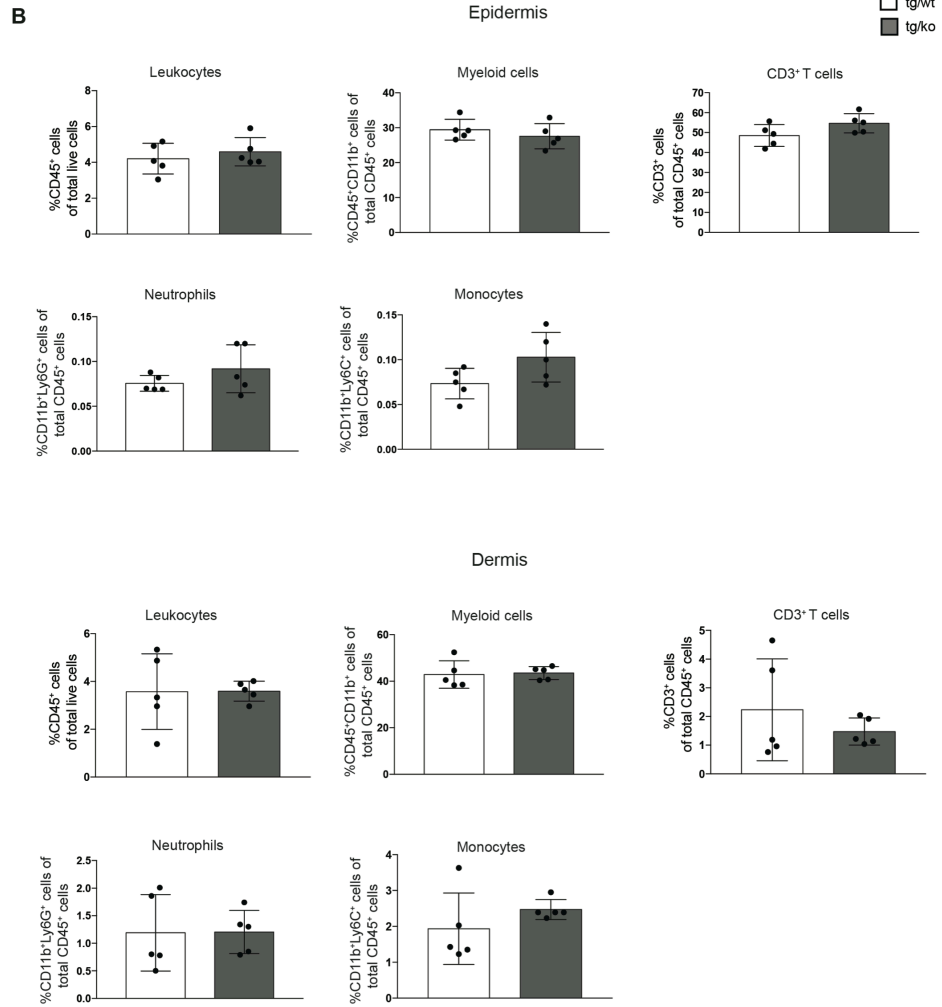

Supplement: pone.0187162.s005.pdf [file pone.0187162.s005.pdf]
